# Supplementary material for: Prenatal and Postnatal Hair Steroid Levels Predict Post-Partum Depression 12 Weeks after Delivery
Source: J Clin Med. 2019 Aug 23;8(9):1290. doi: 10.3390/jcm8091290 (PMC6780455; doi:10.3390/jcm8091290)
Supplement: Supplementary file 1 [file jcm-08-01290-s001.pdf]

**Table S1.** Overview of the quality check, as described in the Systematic Assessment of Quality in Observational Research (SAQOR).

| Dimensions                                            |                                                                                             | Present Study                                                                                                                                                            | Scores     | Sub/Total Score |
|-------------------------------------------------------|---------------------------------------------------------------------------------------------|--------------------------------------------------------------------------------------------------------------------------------------------------------------------------|------------|-----------------|
| <b>Sample</b>                                         |                                                                                             |                                                                                                                                                                          |            |                 |
| 1                                                     | The sample is representative of the population from which is was drawn                      | Yes; a total of 495 women 12 weeks after delivery were screened.                                                                                                         | 1          |                 |
| 2                                                     | The source of the sample is clearly stated                                                  | Yes; all participants gave birth at the Fatemieh Hospital (Hamadan) and attended the hospital for routine check                                                          | 1          |                 |
| 3                                                     | The sampling method is described                                                            | Yes; participants were consecutively assessed and divided into participants with or without post-partum depression                                                       | 1          |                 |
| 4                                                     | The sample size is appropriate to determine statistical significance for primary outcomes   | Yes, a power calculation was performed to estimate the minimum sample size                                                                                               | 1          |                 |
| 5                                                     | Entry criteria and exclusions are stated and justified                                      | Yes, inclusion and exclusion criteria are clearly stated                                                                                                                 | 1          |                 |
| Sample: total score:                                  |                                                                                             |                                                                                                                                                                          | 5 out of 5 | 5/5             |
| <b>Control/comparison group</b>                       |                                                                                             |                                                                                                                                                                          |            |                 |
| 5                                                     | Control group is included                                                                   | Yes, 50 women 12 weeks after delivery without post-partum depression                                                                                                     | 1          |                 |
| 6                                                     | The control group is easily identifiable                                                    | Yes, see text and Table 2 for description of the control group                                                                                                           | 1          |                 |
| 7                                                     | The source of the control is explained and appropriate                                      | Yes; controls are recruited from the same hospital and assessed by the same medical and nursing staff                                                                    | 1          |                 |
| 8                                                     | Controls are matched or randomized                                                          | Controls are matched                                                                                                                                                     | 1          |                 |
| 9                                                     | Statistical difference between cases and controls have been controlled for                  | Yes, see Table 2; women with or without post-partum depression do not statistically differ as regards age, gestational age, and neonates' Apgar score 10' after delivery | 1          |                 |
| Control/comparison group total score:                 |                                                                                             |                                                                                                                                                                          | 5 out of 5 | 10/10           |
| <b>Quality of exposure/outcome measurements</b>       |                                                                                             |                                                                                                                                                                          |            |                 |
| 10                                                    | Adequate assessment of exposure                                                             | N/A                                                                                                                                                                      | 0          |                 |
| 11                                                    | Adequate measure of outcomes                                                                | Yes, hair steroids                                                                                                                                                       | 1          |                 |
| Quality of exposure/outcome measurements total score: |                                                                                             |                                                                                                                                                                          | 1 out of 2 | 11/12           |
| <b>Distorting influences</b>                          |                                                                                             |                                                                                                                                                                          |            |                 |
| 12                                                    | Key confounder 1 (MDD) is controlled for/taken into account in the design or analysis       | Yes, though scores of MDD/PPD are also outcome variables                                                                                                                 | 1          |                 |
| 13                                                    | Key confounder 2 are controlled for/taken into account in the design or analysis            | Yes, preliminary calculations showed that age, gestational age and infants' Abgar index did not differ between the two groups                                            | 1          |                 |
| 14                                                    | Other potential confounders are controlled for/taken into account in the design or analysis | Yes, to avoid possible borderline self-ratings of post-partum depression, inclusion and exclusion criteria were defined in a restrictive fashion                         | 1          |                 |
| Distorting influences total score                     |                                                                                             |                                                                                                                                                                          | 3 out of 3 | 14/15           |
| <b>Reporting of data</b>                              |                                                                                             |                                                                                                                                                                          |            |                 |
| 15                                                    | Explanation for missing data is given                                                       | Yes, though, no missing data did occur                                                                                                                                   | 1          |                 |
| 16                                                    | Data are clearly and accurately presented including CI were appropriate                     | Yes, all descriptive and inferential statistical indices are reported (see Table 3); effect sizes are reported for <i>t</i> - and <i>F</i> -test following Cohen [2]     | 1          |                 |
| Reporting of data total score                         |                                                                                             |                                                                                                                                                                          | 2 out of 2 | 16/17           |
| Overall conclusion of the quality                     |                                                                                             |                                                                                                                                                                          |            | HIGH            |
